# Supplementary material
Source: PubMed Central journal article supplement (PMC3067625)
Supplement: supp_193_6_1359__1.pdf [file supp_193_6_1359__1.pdf]

Supplemental Information for:

“The Effect of Metal on the Biochemical Properties of the *Helicobacter pylori* HypB, a Maturation Factor of [NiFe]-Hydrogenase and Urease”

A. M. Sydor, J. Liu, and D. B. Zamble

**Table S1:** PCR primers used for cloning and mutagenesis.<sup>a</sup>

| Primer Name          | Primer Sequence                                     |
|----------------------|-----------------------------------------------------|
| HpHypB forward       | 5' <b>AAGGAACCATATGAGCGAACAACGACAAG</b> 3'          |
| HpHypB reverse       | 5' <b>TCGCTACTCGAGTTAAAACGAATGCGTGG</b> 3'          |
| C106A, H107A forward | 5' <b>CACCACCGGCGAAGCAgcCgcTTTGGGAAGCGAGCATG</b> 3' |
| C106A, H107A reverse | 5' <b>CATGCTCGCTTCCAAAgcGgcTGCTTCGCCGGTGGTG</b> 3'  |

<sup>a</sup> Restriction enzyme sites are shown in bold. Mutations are shown in lowercase.

**Table S2:** Summary of gel filtration chromatography results of WT and mutant *HpHypB* with added metals.<sup>a</sup>

| Protein                       | Added Metal                    | Elution Volume<br>(mL) | Calculated MW<br>(kDa) | Relative Peak<br>Area <sup>b</sup> | Assignment |
|-------------------------------|--------------------------------|------------------------|------------------------|------------------------------------|------------|
| WT <i>HpHypB</i>              | Apo                            | 16.9 ± 0.2             | 28.1 ± 2.6             | 100                                | Monomer    |
|                               | 0.5 eq. Ni(II)                 | 15.9 ± 0.1             | 44.7 ± 1.6             | 76                                 | Dimer      |
|                               |                                | 17.2 ± 0.1             | 23.0 ± 0.7             | 24                                 | Monomer    |
|                               | 1 eq. Ni(II)                   | 15.7 ± 0.1             | 50.9 ± 1.9             | 100                                | Dimer      |
|                               | 1 eq. Zn(II)                   | 15.6 ± 0.1             | 52.7 ± 2.7             | 3.5                                | Dimer      |
|                               |                                | 17.0 ± 0.1             | 25.8 ± 1.0             | 96.5                               | Monomer    |
|                               | 1 eq. Zn(II) + 1<br>eq. Ni(II) | 15.86 ± 0.01           | 46.2 ± 0.2             | 5                                  | Dimer      |
|                               | 17.34 ± 0.02                   | 21.9 ± 0.2             | 95                     | Monomer                            |            |
| C106A, H107A<br><i>HpHypB</i> | Apo                            | 17.2 ± 0.1             | 23.8 ± 0.8             | 100                                | Monomer    |
| <i>HpHypB</i>                 | 1 eq. Ni(II)                   | 17.1 ± 0.1             | 24.5 ± 0.8             | 100                                | Monomer    |
|                               | 1 eq. Zn(II)                   | 17.11 ± 0.01           | 24.6 ± 0.1             | 100                                | Monomer    |

<sup>a</sup> Errors are standard deviations of at least two replicates. The expected molecular weights are: WT *HpHypB* monomer: 27.2 kDa; WT *HpHypB* dimer: 54.4 kDa; C106A, H107A *HpHypB* monomer: 27.1 kDa.

<sup>b</sup> The relative peak areas varied by <3.5 % of the total peak area.

**Table S3:** Summary of gel filtration chromatography results of WT *HpHypB* with added nucleotides.<sup>a</sup>

| <b>Added ligand</b>                                    | <b>Elution Volume<br/>(mL)</b> | <b>Calculated MW<br/>(kDa)</b> | <b>Relative Peak<br/>Area<sup>b</sup></b> | <b>Assignment</b> |
|--------------------------------------------------------|--------------------------------|--------------------------------|-------------------------------------------|-------------------|
| <b>5 eq. GTP</b>                                       | 15.9 ± 0.2                     | 45.4 ± 4.0                     | 8                                         | Dimer             |
|                                                        | 17.2 ± 0.3                     | 24.0 ± 3.2                     | 92                                        | Monomer           |
| <b>5 eq. GDP</b>                                       | 16.0 ± 0.1                     | 43.9 ± 1.7                     | 9.5                                       | Dimer             |
|                                                        | 17.4 ± 0.1                     | 21.3 ± 0.7                     | 90.5                                      | Monomer           |
| <b>1 eq. Ni(II) + 5 eq. GDP</b>                        | 15.8 ± 0.2                     | 48.0 ± 4.4                     | 81.5                                      | Dimer             |
|                                                        | 17.21 ± 0.04                   | 23.4 ± 0.4                     | 18.5                                      | Monomer           |
| <b>1 eq. Ni(II) + 5 eq. GTP</b>                        | 16.03 ± 0.04                   | 42.4 ± 8.0                     | 84                                        | Dimer             |
|                                                        | 17.29 ± 0.03                   | 22.4 ± 0.3                     | 16                                        | Monomer           |
| <b>5 eq. GTP + 400 μM GTP<br/>in MP</b>                | 16.8 ± 0.1                     | 58.4 ± 3.5                     | 31.5                                      | Dimer             |
|                                                        | 18.34 ± 0.04                   | 27.6 ± 0.6                     | 68.5                                      | Monomer           |
| <b>5 eq. GDP + 400 μM GDP<br/>in MP</b>                | 16.99 ± 0.01                   | 54.2 ± 0.4                     | 27                                        | Dimer             |
|                                                        | 18.3 ± 0.1                     | 28.1 ± 2.0                     | 73                                        | Monomer           |
| <b>5 eq. GTP + 400 μM GTP<br/>in MP + 1 eq. Zn(II)</b> | 18.33 ± 0.04                   | 27.9 ± 0.5                     | 100                                       | Monomer           |
| <b>5 eq. GDP + 400 μM GDP<br/>in MP + 1 eq. Zn(II)</b> | 18.225 ± 0.007                 | 29.3 ± 0.1                     | 100                                       | Monomer           |

<sup>a</sup>Errors are standard deviations of at least two replicates. The expected molecular weights are: WT *HpHypB* monomer; 27.2 kDa; WT *HpHypB* dimer; 54.4 kDa. MP indicates that the nucleotide was included in the mobile phase.

<sup>b</sup>The relative peak areas varied by <3.5 % of the total peak area.

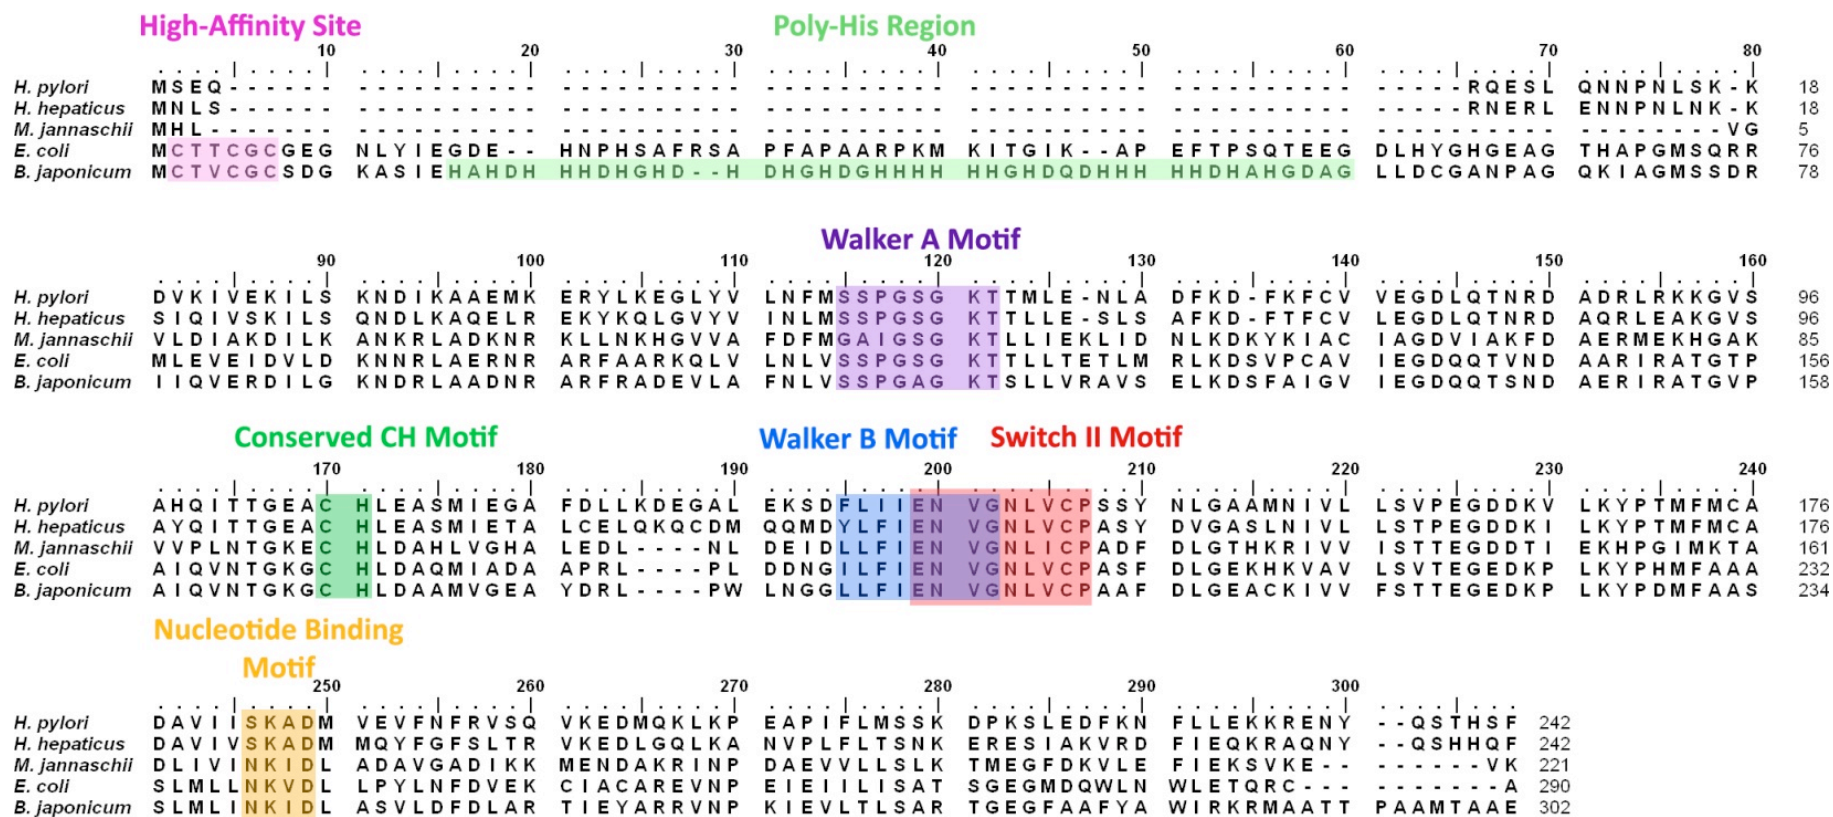

**Figure S1.** Amino acid alignment of HpHypB with homologs. The specific strains are as follows: *Escherichia coli* K12 substr. MG1655, *Helicobacter pylori* 26695, *Helicobacter hepaticus* ATCC 51449, *Bradyrhizobium japonicum* USDA110, and *Methanocaldococcus jannaschii* DSM 2661. All sequences were retrieved from the NCBI database and aligned using ClustalW (1).

REFERENCES

1. **Higgins, D. G., and Sharp, P. M.** 1988. CLUSTAL: a package for performing multiple sequence alignment on a microcomputer. *Gene* 73:237-244.
